# Supplementary material for: Qualichem In Vivo: A Tool for Assessing the Quality of In Vivo Studies and Its Application for Bisphenol A
Source: PLoS One. 2014 Jan 29;9(1):e87738. doi: 10.1371/journal.pone.0087738 (PMC3906223; doi:10.1371/journal.pone.0087738)
Supplement: Text S9 — Spreadsheet for Stump (2009). (XLS) [file pone.0087738.s009.xls]

## Sheet: Sheet1
	pedigree	25th	50th	75th		25th	50th	75th
BF	2	1	1	2	78	0	1	2
DO	2	1	2	3	66	1	2	2
CJ	2.25	1	2	3	62	0.5	1	3.5
DE	2	1	2	2	62	1	1	2
AA	2	1	2	3	47	1	2	2
DK	2.5	2	2	3	46	2	2	3
DA	2.5	1	2	3	34	2	2	3
CH	2	2	2	3	32	2	2	3
BC	2	2	2	3	28	2	2	3
DB	2	1	2	2	26	2	2	3
	Statistic	BF (78)	DO (66)	CJ (62)	DE (62)	AA (47)	DK (46)	DA (34)	CH (32)	BC (28)	DB (26)
	Median	1	2	2	2	2	2	2	2	2	2
	q1	1	1	1	1	1	2	1	2	2	1
	min	0	0	0	0	0	1	0	0	0	0
	max	3	3	4	4	3	4	4	4	4	4
	q3	2	3	3	2	3	3	3	3	3	2

## Sheet: BF
Score	4	3	2	1	0
SitBep	1	1	1	11	4
Plau	0	1	4	9	4
KeuzeR	2	4	6	4	2
OvExp	0	6	4	4	4
OvSta	0	1	10	4	2
Belang	4	2	5	4	2
						n	25th	50th	75th
Invloed	0	2	3	7	6	18	13.5	9	4.5
	0	2	5	12	18		0	1	2
							75th	50th	25th
	7	15	30	36	18	106	79.5	53	26.5
	7	22	52	88	106
							1	1	2

## Sheet: DO
Score	4	3	2	1	0
SitBep	1	2	4	8	2
Plau	1	3	3	9	1
KeuzeR	2	3	6	5	0
OvExp	1	7	3	3	2
OvSta	0	5	6	2	0
Belang	1	4	5	7	0
						n	25th	50th	75th
Invloed	0	3	6	5	3	17	12.75	8.5	4.25
	0	3	9	14	17		1	2	2
							25th	50th	75th
	6	24	27	34	5	96	72	48	24
	6	30	57	91	96
							1	2	3

## Sheet: Qualichem Stump
	pedigree	25th	50th	75th		25th	50th	75th
	Statistic	Storage conditions	Sensitivity assay	Robustness of regulatory guidelines	Choice of parameters for the effects observed	Performance of effects measurement instruments and methods	Toxicokinetic stage for measuring exposure	Statistical method for analysing results	Statistical power	Assessment of uncertainty	Interpretation of dose-response	Interpretation of biological mechanisms	Extrapolation animal human	Interpretation of results in accordance with raw data	Assumptions	Epistemological background	Variability
	Median	6	5.5	4	4	4	6	5	6	4.5	4	5	4	5	4	3	5
	q1	1	2	2	1	1	2	2	1	1	2	2	3	1	1	2	1
	min	1	2	2	1	1	2	2	1	1	2	2	3	1	1	2	1
	max	6	6	6	6	6	6	6	6	6	6	6	5	6	6	6	6
	q3	6	6	6	5	4	6	6	6	6	6	6	5	6	6	3	5
